# Supplementary material for: Comparison of physical fitness and mental health status among school-age children with different sport-specific training frequencies
Source: PeerJ. 2021 Feb 2;9:e10842. doi: 10.7717/peerj.10842 (PMC7906039; doi:10.7717/peerj.10842)
Supplement: Data S1 [file peerj-09-10842-s001.xls]

## Sheet: Raw data
Number	Age	Grade	PF score
1	7.77	2	88.35
2	9.24	2	57.5
3	8.68	2	82
4	7.88	2	94
5	7.47	2	80.6
6	8.35	2	92.05
7	8.26	2	88.25
8	7.74	2	73.6
9	8.48	2	87.2
10	8.38	2	77.4
11	8.06	2	83.25
12	8.04	2	76.4
13	8.5	2	64.35
14	8.21	2	93
15	8.08	2	82
16	8.2	2	81.7
17	8.52	2	71.5
18	8.55	2	89.75
19	8.26	2	81.6
20	8.67	2	92.25
21	8.05	2	81.4
22	8.55	2	76.2
23	8.23	2	89.8
24	8.43	2	78
25	8.69	2	85
26	8.09	2	84.4
27	8.25	2	83.8
28	8.56	2	82.4
29	8.19	2	72.6
30	8.61	2	88
31	8.47	2	75.3
32	7.89	2	75.45
33	9.02	2	85.6
34	8.66	2	85.3
35	8.44	2	82
36	7.74	2	88.3
37	8.65	2	91
38	8.2	2	88.6
39	9.7	2	80.15
40	8.15	2	83.4
41	8.55	2	80.85
42	8.37	2	80.4
43	7.92	2	75.8
44	8.76	2	89.6
45	8.3	2	75
46	8.1	2	88.4
47	9.41	2	79.9
48	10.21	2	70.55
49	8.24	2	71.45
50	8.2	2	73.8
51	8.14	2	71.1
52	8.3	2	87.7
53	8.32	2	87.45
54	8.3	2	85.3
55	8.69	2	84.6
56	8.64	2	82.5
57	8.55	2	67.2
58	7.99	2	85.2
59	7.96	2	81.5
60	7.98	2	89.65
61	8.47	2	79.1
62	8.51	2	74.3
63	8.21	2	74.8
64	8.01	2	82.25
65	9.94	2	79
66	8.1	2	78.4
67	8.54	2	84.9
68	7.47	2	79.75
69	8.68	2	73.9
70	8.67	2	80.4
71	9.6	2	88.1
72	8.64	2	88.65
73	9.04	2	89.65
74	8.57	2	83.4
75	8.55	2	70.4
76	8.6	2	86.6
77	8.58	2	66.2
78	9.12	2	85.9
79	8.7	2	79.6
80	9.53	3	81.2
81	9.19	3	86.7
82	8.87	3	74
83	9.49	3	87.4
84	8.88	3	91
85	9.66	3	73.25
86	9.75	3	90.35
87	9.61	3	82.8
88	9.22	3	92.1
89	9.57	3	67.2
90	8.8	3	79.4
91	8.76	3	80.8
92	9.67	3	82.55
93	9.27	3	85.3
94	8.95	3	70.05
95	9.35	3	87.15
96	9.73	3	86.7
97	8.97	3	86.9
98	9.67	3	87.35
99	8.95	3	91.5
100	8.82	3	76.2
101	9.7	3	75.55
102	9.76	3	68.4
103	9.15	3	46.6
104	9.16	3	67.4
105	9.41	3	92.1
106	9.27	3	88.1
107	9.45	3	88.5
108	8.95	3	82.3
109	9.41	3	85.3
110	9.42	3	79.2
111	9.39	3	85
112	9.2	3	86.4
113	8.99	3	76.6
114	8.99	3	82.6
115	8.84	3	92.85
116	9.94	3	66.9
117	9.19	3	85.6
118	8.84	3	89.6
119	9.28	3	87.2
120	9.62	3	85.8
121	9.38	3	86.6
122	9.14	3	74.6
123	9.62	3	83.2
124	9.06	3	72.45
125	8.89	3	58.6
126	9.49	3	82
127	9.01	3	88.3
128	9.07	3	81.4
129	8.95	3	76.9
130	8.92	3	87.3
131	9.76	3	76.4
132	9.6	3	79.6
133	9.41	3	52.6
134	9.55	3	80.8
135	8.95	3	78.4
136	9.66	3	83.4
137	9.02	3	66.4
138	8.92	3	90.4
139	9.16	3	78.6
140	9.5	3	80.2
141	9	3	84.8
142	9.19	3	73.75
143	9.64	3	84
144	8.91	3	69.6
145	9.08	3	64.1
146	8.97	3	71.3
147	8.88	3	81.2
148	9.76	3	84
149	9.05	3	79.2
150	9.22	3	90.85
151	9.65	3	84.2
152	8.85	3	77.1
153	9.71	3	64.2
154	9.21	3	56.35
155	8.81	3	62.9
156	9.58	3	88.7
157	9.2	3	91
158	9.65	3	53.6
159	10.41	4	85.55
160	10.07	4	72.7
161	9.52	4	87.1
162	9.52	4	86
163	9.85	4	86.6
164	10.34	4	74.6
165	10.08	4	54.35
166	10.71	4	87.2
167	10.19	4	80.5
168	9.91	4	85.8
169	10.95	4	83
170	11.73	4	91.35
171	10.32	4	84.6
172	9.94	4	68.8
173	9.78	4	97
174	10.54	4	83.3
175	10.12	4	95
176	10.51	4	75.5
177	9.78	4	79.55
178	10.27	4	78.5
179	10.2	4	76.3
180	10.25	4	87.2
181	9.47	4	93.1
182	10.51	4	80
183	10.46	4	89.5
184	10.25	4	83.35
185	9.48	4	75.1
186	10.37	4	86
187	10.41	4	84.6
188	10.38	4	88.2
189	10.06	4	85.3
190	9.98	4	75.5
191	9.56	4	83.7
192	10.55	4	97
193	10.21	4	75.3
194	9.62	4	98
195	10.45	4	80.4
196	9.82	4	78.7
197	10.26	4	72.3
198	10.2	4	73.8
199	9.86	4	79.15
200	10.11	4	72.9
201	9.92	4	78
202	9.82	4	73.7
203	10.07	4	76.2
204	10.27	4	89.4
205	10.55	4	87.15
206	9.87	4	75.7
207	10.07	4	89.65
208	10.16	4	71.4
209	9.78	4	73.6
210	9.83	4	85.4
211	10.42	4	77.8
212	10.25	4	81.25
213	10.5	4	95.5
214	10.15	4	91.85
215	10.54	4	85.75
216	9.28	4	68.4
217	10.24	4	76.5
218	10.17	4	69.2
219	10.35	4	86.6
220	10.13	4	84.8
221	10.95	4	88.4
222	9.85	4	80.3
223	10.33	4	83.35
224	9.99	4	73.6
225	9.77	4	60.6
226	10.55	4	78.75
227	10.69	4	75.4
228	10.38	4	80.8
229	9.87	4	78.7
230	10.76	4	80.65
231	10.62	4	84
232	10.12	4	74.8
233	9.89	4	77.5
234	10.62	4	84.6
235	10.61	4	86.2
236	10.7	4	60.6
237	11.75	5	90.5
238	11.12	5	89.6
239	11.78	5	86
240	11.43	5	82.75
241	11.9	5	81.4
242	11.73	5	85.75
243	10.77	5	77.4
244	11.25	5	91.15
245	11.66	5	72.8
246	11.66	5	77.4
247	11.75	5	87.8
248	11.19	5	91.35
249	11.08	5	72.5
250	11.52	5	85.35
251	11.52	5	92.1
252	11.38	5	86.1
253	11.12	5	88.55
254	11.14	5	82.65
255	10.53	5	91.1
256	11.02	5	81.5
257	11.71	5	85.4
258	10.94	5	89.3
259	10.98	5	76.9
260	10.79	5	77.8
261	11.49	5	81.4
262	11.52	5	86.1
263	10.94	5	73.4
264	11.36	5	78.2
265	12.64	5	92.6
266	11.11	5	86.3
267	11.67	5	75.4
268	10.77	5	91.1
269	11.42	5	86.5
270	11.61	5	95
271	11.64	5	79.65
272	10.83	5	78.75
273	11.19	5	70.65
274	11.61	5	84.1
275	11.13	5	80.85
276	12.35	5	90
277	11.31	5	87.3
278	11.59	5	85.1
279	10.98	5	84.1
280	11.61	5	76
281	11.08	5	79.75
282	10.93	5	76.7
283	11.5	5	82.9
284	10.82	5	81.55
285	11.17	5	90.1
286	10.87	5	82.6
287	10.99	5	85.35
288	11.13	5	91.4
289	11.08	5	82.95
290	11.04	5	72.1
291	11.38	5	84.3
292	11.65	5	82.4
293	11.08	5	89.7
294	10.64	5	69.2
295	11.71	5	69.4
296	11.46	5	79.1
297	11.48	5	71.2
298	10.84	5	81.5
299	11.26	5	82.4
300	10.93	5	76.3
301	10.95	5	68.7
302	11.75	5	92.1
303	10.6	5	85.9
304	11.27	5	87.55
305	11.7	5	80.25
306	11.39	5	35.5
